# Supplementary material for: Slow‐replicating leukemia cells represent a leukemia stem cell population with high cell‐surface CD74 expression
Source: PubMed Central journal article supplement (PMC11459046; doi:10.1002/1878-0261.13690), 2024-06-22
Supplement: MOL2-18-2554-s003.pdf [file MOL2-18-2554-s003.pdf]

Supplementary Table 1: Top genes up-regulated in leukemia cell of PKH<sup>+</sup> vs PKH<sup>-</sup> and that located in EBM vs CBM

| PKH <sup>+</sup> vs PKH <sup>-</sup> |             | EBM vs CBM |                  |
|--------------------------------------|-------------|------------|------------------|
| Gene. Symbol                         | Fold Change | Gene name  | log2 Fold Change |
| Vcam1                                | 11.76898724 | Hspa1a     | 4.493235445      |
| C1qb                                 | 9.752224459 | Hspa1b     | 3.739108353      |
| Fcer1g                               | 7.724478582 | Iqcn       | 3.475739741      |
| Slc40a1                              | 6.851820622 | Ii1b       | 3.249087179      |
| Hmox1                                | 6.352831063 | H2-Ab1     | 2.949125654      |
| Igkv4-53                             | 6.14021413  | Ii1a       | 2.681102474      |
| Lilrb4                               | 5.907336539 | Rnd1       | 2.660269619      |
| Cd68                                 | 5.890761878 | Bcl3       | 2.516102177      |
| Emr4                                 | 5.65242051  | Gm27010    | 2.445299781      |
| Fcgrt                                | 5.633220521 | Trp53inp2  | 2.335809269      |
| Ctsb                                 | 5.229729032 | Gm29371    | 2.333500751      |
| Ctsc                                 | 5.115423634 | Dusp8      | 2.237438769      |
| Mrc1                                 | 5.069284994 | Trib1      | 2.126242878      |
| Ear2                                 | 4.609441211 | Cd74       | 2.068227992      |
| Igsf6                                | 4.607439446 | Gm43305    | 2.048345748      |
| Spic                                 | 4.538223225 | Nfkbiz     | 2.016304918      |
| Cfp                                  | 4.248550782 |            |                  |
